## **Epidemiological and clinical features of the 2019 novel coronavirus outbreak in China**

Yang Yang<sup>1\*</sup>, Qing-Bin Lu<sup>2</sup>, Ming-Jin Liu<sup>1</sup>, Yi-Xing Wang<sup>3</sup>, An-Ran Zhang<sup>1,3,4</sup>, Neda Jalali<sup>1</sup>, Natalie E. Dean<sup>1</sup>, Ira Longini<sup>1</sup>, M. Elizabeth Halloran<sup>5</sup> Bo Xu<sup>6</sup>, Xiao-Ai Zhang<sup>3</sup>, Li-Ping Wang<sup>7\*</sup>, Wei Liu<sup>3\*</sup>, Li-Qun Fang<sup>3\*</sup>

### **\*Correspondence:**

L. Q. Fang or W. Liu, State Key Laboratory of Pathogen and Biosecurity, 20 Dong-Da Street, Beijing Institute of Microbiology and Epidemiology, Fengtai District, Beijing, China 100071 (fang\_lq@163.com or lwbime@163.com); Y. Yang, Department of Biostatistics, College of Public Health and Health Professions, and Emerging Pathogens Institute, University of Florida, Gainesville, FL, USA 32611 (yangyang@ufl.edu); L. P. Wang, Division of Infectious Disease, Key Laboratory of Surveillance and Early-warning on Infectious Disease, Chinese Centre for Disease Control and Prevention, Beijing, China 102206 (wanglp@chinacdc.cn)

Our manuscript was based on surveillance cases of COVID-19 identified before January 26, 2020. As of February 20, 2020, the total number of confirmed cases in mainland China has reached 18 times of the number in our manuscript. While the methods and the main conclusions in our original analyses remain solid, we decided to withdraw this preprint for the time being, and will replace it with a more up-to-date version shortly. Please do not cite this preprint. Should you have any comments or suggestions, please feel free to contact the corresponding author, Dr. Liqun Fang.
